# Supplementary material
Source: Springer Nature journal article supplement (https://www.springermedizin.de/resource/supplementary/13048_2013_146_MOESM2_ESM.pdf/9665000)

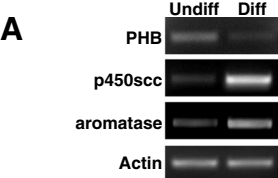

**B Undifferentiated GCs**

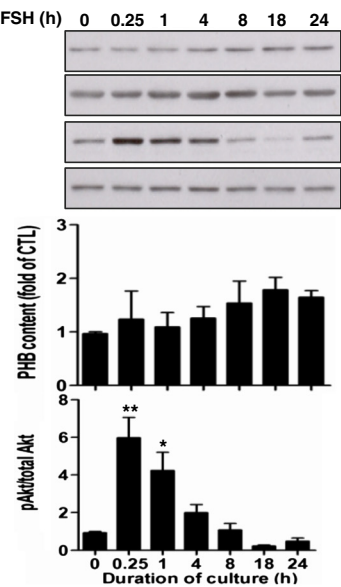

**Differentiated GCs**

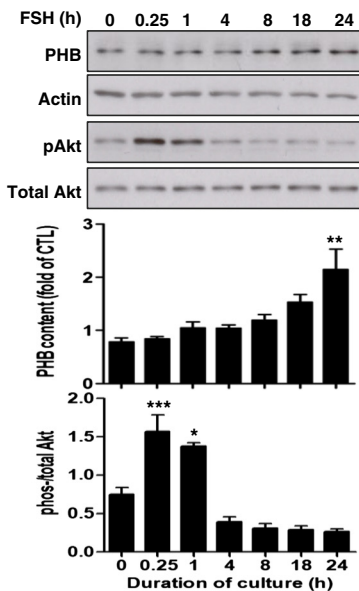

**C Undifferentiated GCs**

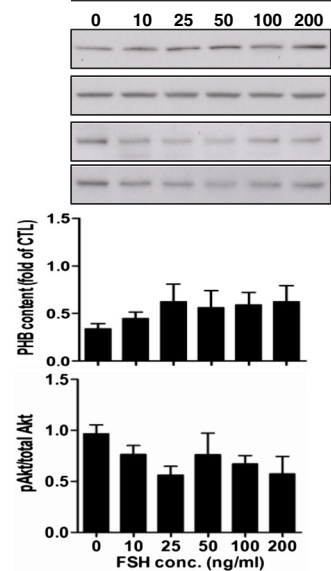

**Differentiated GCs**

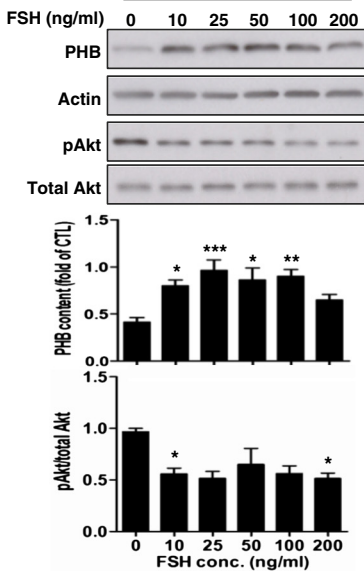

Supplement: MOESM2 [file 9665000]
